# Supplementary material
Source: publisher figshare collection journal article supplement (https://acs.figshare.com/ndownloader/files/6638004)
Supplement: Supplementary file 1 [file 6638004]

## Supporting Information

# **Switch of Surface Adhesion to Cohesion by Dopa-Fe<sup>3+</sup> Complexation in Response to Microenvironment at the Mussel Plaque-Substrate Interface**

Byeongseon Yang<sup>†</sup>, Chanoong Lim<sup>‡</sup>, Dong Soo Hwang<sup>‡</sup>, and Hyung Joon Cha<sup>\*,†</sup>

<sup>†</sup>Department of Chemical Engineering, <sup>‡</sup>School of interdisciplinary Bioscience and Bioengineering, Pohang University of Science and Technology, Pohang 37673, Republic of Korea

\*e-mail: hjcha@postech.ac.kr

**Table S1.** Thickness of *drfp*-3F film on mica surface measured by SFA under the following four different conditions: in 0.1 M acetic acid (pH ~3) without  $\text{Fe}^{3+}$ , in 0.1 M acetic acid (pH ~3) with  $\text{Fe}^{3+}$ , in 0.1 M Tris buffer (pH 8.0) without  $\text{Fe}^{3+}$ , and in 0.1 M Tris buffer (pH 8.0) with  $\text{Fe}^{3+}$ .

| Condition               | Asymmetric thickness | Symmetric thickness |
|-------------------------|----------------------|---------------------|
| pH 3                    | $2.0 \pm 0.6$ nm     | $11.0 \pm 10.1$ nm  |
| pH 3 + $\text{Fe}^{3+}$ | $3.3 \pm 2.7$ nm     | $12.3 \pm 2.7$ nm   |
| pH 8                    | $4.2 \pm 0.2$ nm     | ~50–300 nm          |
| pH 8 + $\text{Fe}^{3+}$ | $6.7 \pm 2.4$ nm     | ~30–150 nm          |

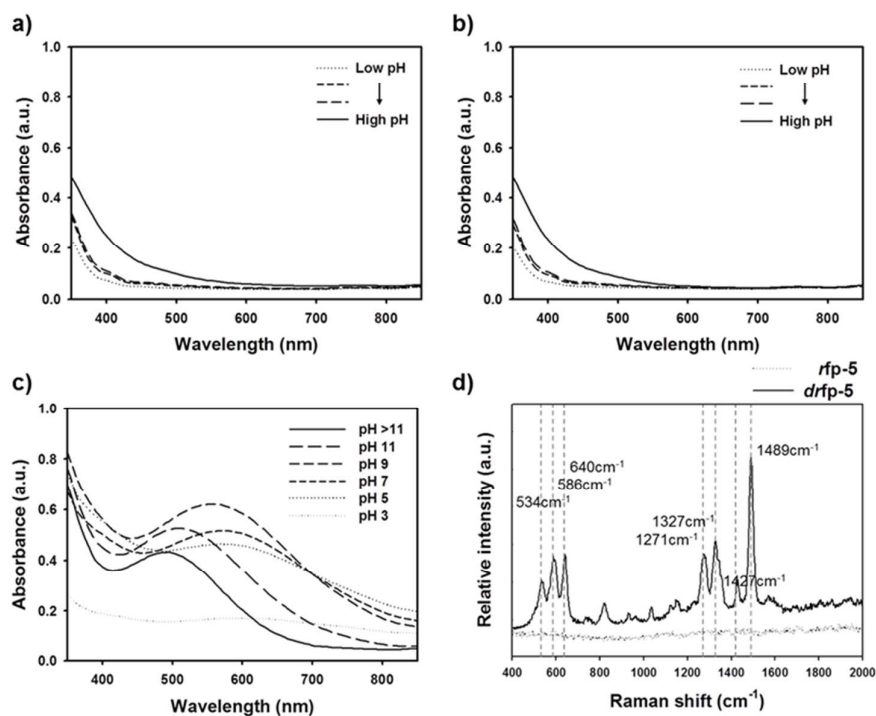

**Figure S1.** Dopa-Fe<sup>3+</sup> complexation of *rfp*-3F, *rfp*-5 and *drfp*-5. (a) The UV-Vis absorbance of *rfp*-3F at different pH. The UV-Vis absorbance of (b) *rfp*-5 and (c) *drfp*-5 at different pH. (d) Resonance Raman spectroscopy of *rfp*-5 and *drfp*-5 with Dopa-Fe<sup>3+</sup> complexation.

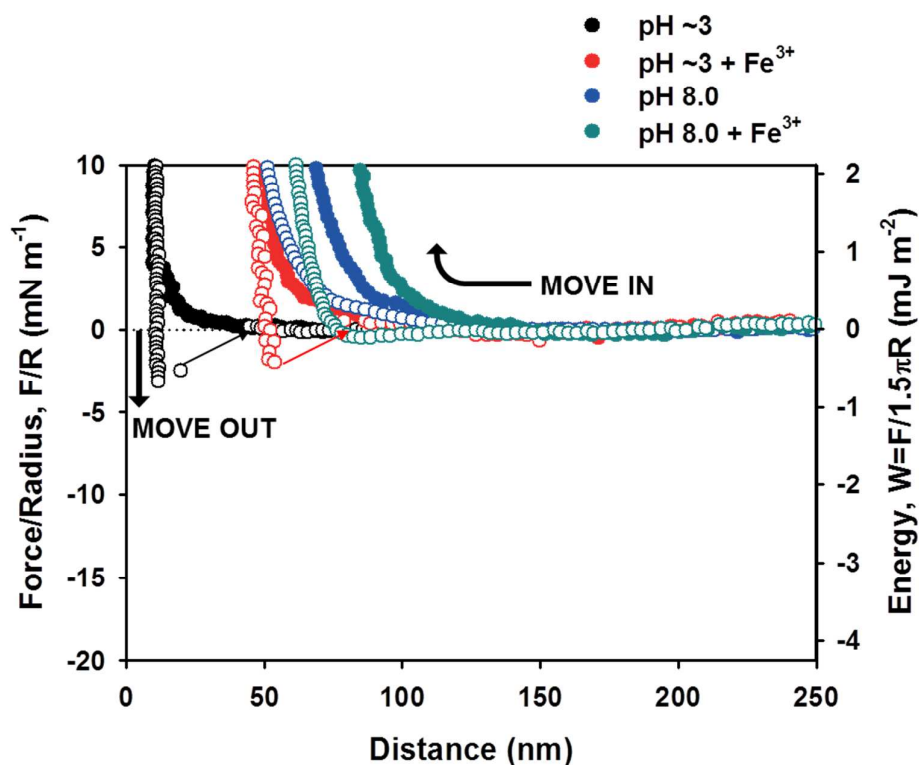

**Figure S2.** SFA analyses of the cohesive interactions of *rfp*-3F. To measure the cohesive interactions of *rfp*-3F, both mica surfaces were coated with *rfp*-3F and  $\text{Fe}^{3+}$ -spiked *rfp*-3F solution was deposited between two symmetric *rfp*-3F films. SFA measurements were conducted under the following four different conditions: 1) in 0.1 M acetic acid (pH ~3) without  $\text{Fe}^{3+}$ , 2) in 0.1 M acetic acid (pH ~3) with  $\text{Fe}^{3+}$  (tyrosine: $\text{Fe}^{3+}$  molar ratio of 3:1), 3) in 0.1 M Tris buffer (pH 8.0) without  $\text{Fe}^{3+}$ , and 4) in 0.1 M Tris buffer (pH 8.0) with  $\text{Fe}^{3+}$  (tyrosine: $\text{Fe}^{3+}$  molar ratio of 3:1). The normalized forces,  $F/R$ , are shown on the left ordinate, whereas the corresponding interaction energies per unit area (defined as  $F/1.5\pi R$ ) are on the right ordinate.

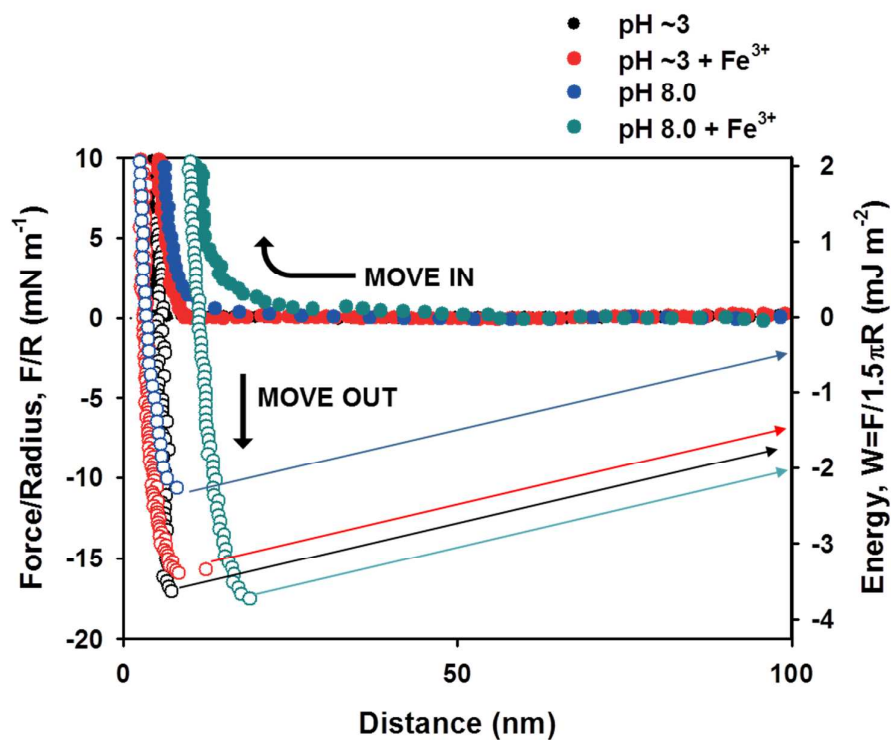

**Figure S3.** SFA analyses of the surface adhesive interactions of *rfp*-3F. To measure the surface adhesive interactions of *rfp*-3F, only one mica surface was coated with *rfp*-3F. SFA measurements were conducted under the following four different conditions: 1) in 0.1 M acetic acid (pH ~3) without  $\text{Fe}^{3+}$ , 2) in 0.1 M acetic acid (pH ~3) with 0.5  $\mu\text{M}$  of  $\text{Fe}^{3+}$ , 3) in 0.1 M Tris buffer (pH 8.0) without  $\text{Fe}^{3+}$ , and 4) in 0.1 M Tris buffer (pH 8.0) with 0.5  $\mu\text{M}$  of  $\text{Fe}^{3+}$ . The normalized forces,  $F/R$ , are shown on the left ordinate, whereas the corresponding interaction energies per unit area (defined as  $F/1.5\pi R$ ) are on the right ordinate.

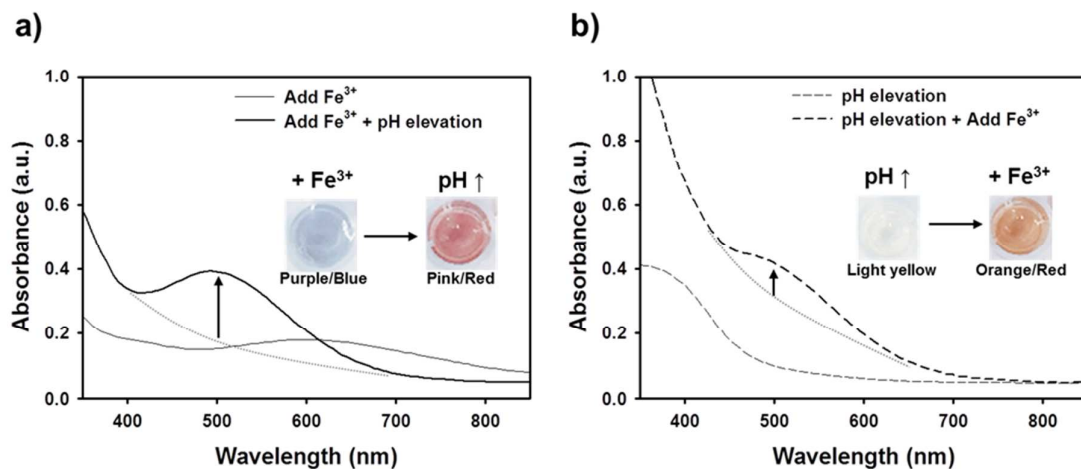

**Figure S4.** UV-Vis absorbance analysis of different Dopa-Fe<sup>3+</sup> complexation pathways. Dopa-Fe<sup>3+</sup> complexation (a) with pH elevation after adding Fe<sup>3+</sup> and (b) with Fe<sup>3+</sup> addition to *drfp*-3F after pH elevation. The color changes are shown in the insets. The black arrow in the graph indicates the absorbance intensity at base-line (gray-dotted line).

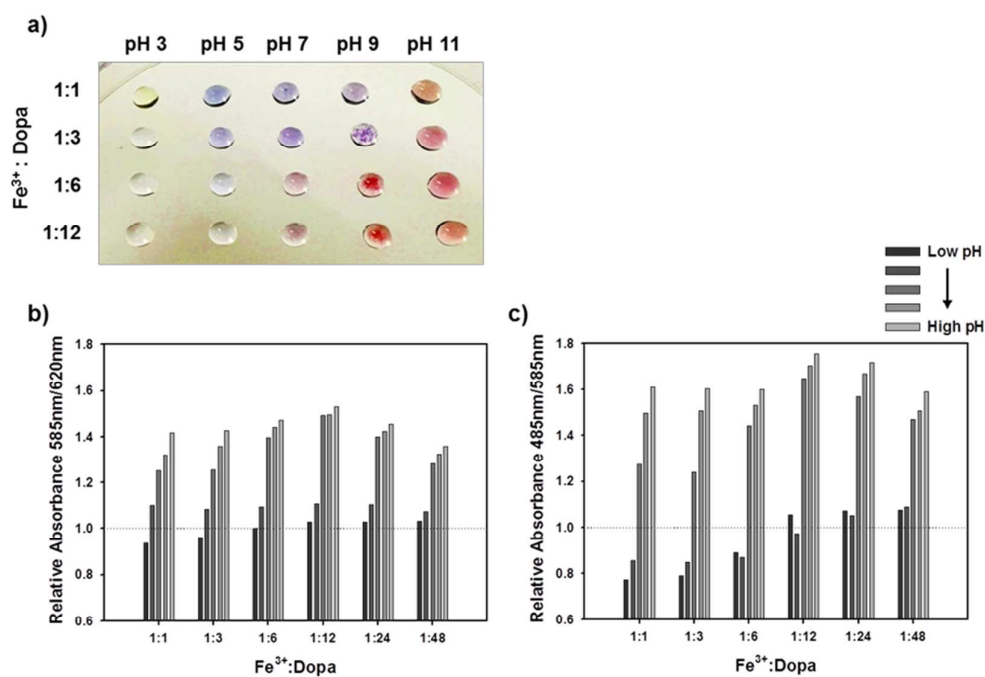

**Figure S5.** Dopa-Fe<sup>3+</sup> complexation depending on Dopa:Fe<sup>3+</sup> ratio and pH. (a) The color changes resulting from Dopa-Fe<sup>3+</sup> complexation. (b) The 585 nm/620 nm absorbance ratio shows the ratio of bis-complex compared to mono-complex. (c) The 485 nm/585 nm absorbance ratio shows the ratio of tris-complex compared to bis-complex. The pH was gradually increased from pH ~3 (light gray bar) to pH >11 (black bar) with NaOH.
